# Supplementary material for: CRISPR/Cas9-mediated Disruption of Fibroblast Growth Factor 5 in Rabbits Results in a Systemic Long Hair Phenotype by Prolonging Anagen
Source: PubMed Central journal article supplement (PMC7140871; doi:10.3390/genes11030297), 2020-03-11
Supplement: genes-11-00297-s001.pdf [file genes-11-00297-s001.pdf]

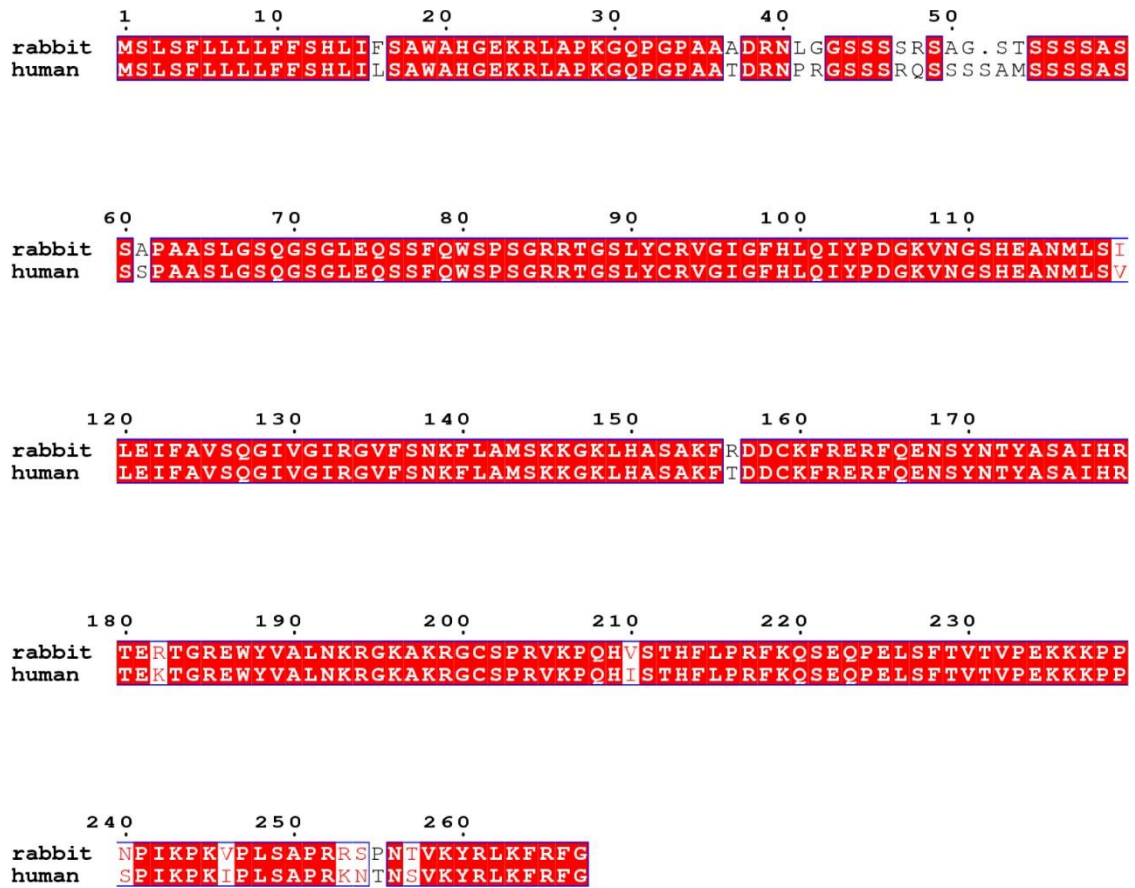

1  
2 **Figure S1. Alignment of amino acid sequences of FGF5 between rabbit and human.**  
3 Identical amino acids are highlighted in red.

- 4
- 5
- 6
- 7
- 8
- 9
- 10
- 11
- 12
- 13
- 14
- 15
- 16
- 17
- 18
- 19
- 20
- 21
- 22
- 23

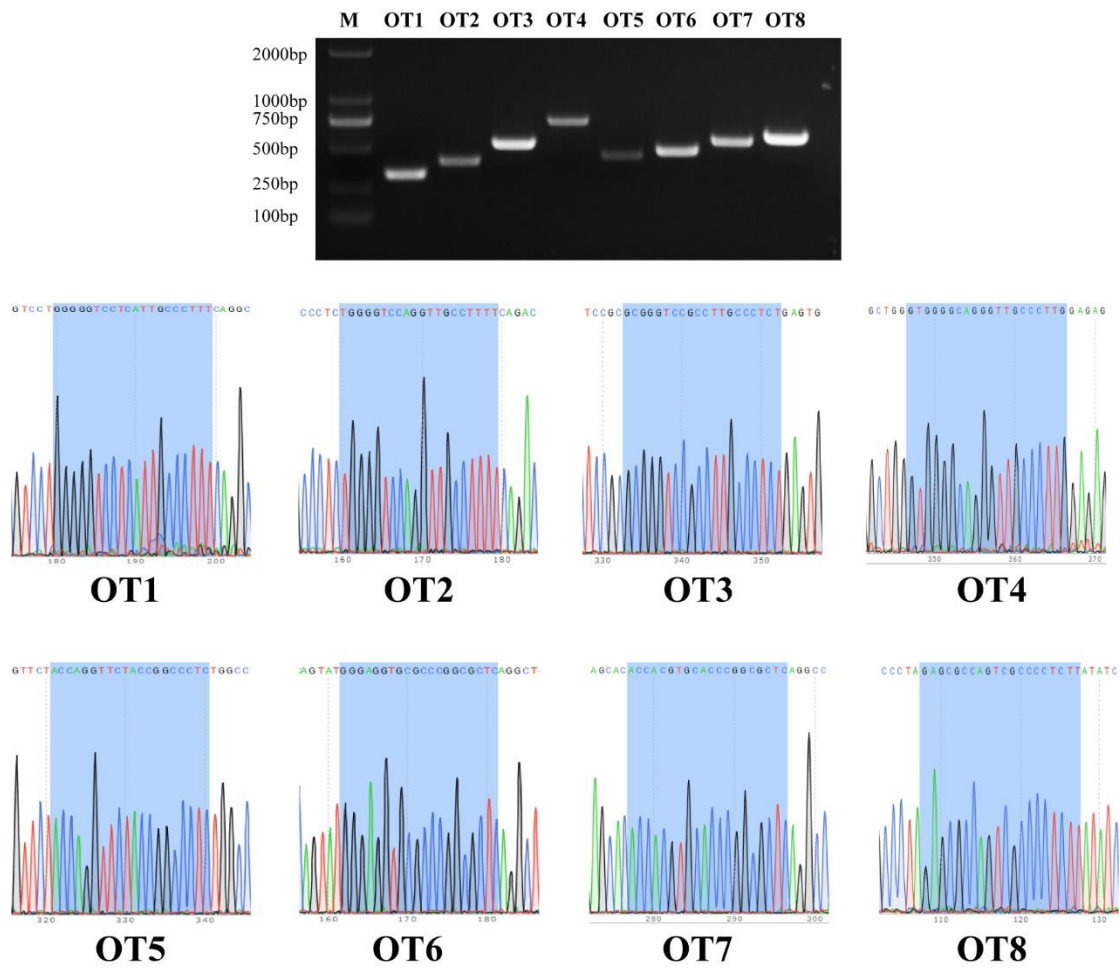

25

26 **Figure S2 Off-target analysis of sgRNAs and sequence diagram of POTs in KO**  
 27 **rabbits.**

28 PCR products of candidate off-target sites for two sgRNAs are analyzed and no  
 29 fragment are found in gel electrophoresis. Sequence diagram of 10 potential off-target  
 30 sites is shown and no double curve are found. Blue area represents sequencing of the  
 31 POTs.

32

33

34

35

36

37

38

39

40

41

42

43

44

| Label | Gene Sequence                                                                                                                    | Indel Type             | Fragment Change          |                                                | Allelic Modification                 |
|-------|----------------------------------------------------------------------------------------------------------------------------------|------------------------|--------------------------|------------------------------------------------|--------------------------------------|
| #1    | GCCCCAAAGGCAACCCGGACCCGCTG...32bp...AGCCGGAGCGCCGGTAGCACCTGCTT<br>GCCCCAAAGGCAACCCGGACCCGCTG...32bp...AGCCGGAGCGCCGGTAGCACCTGCTT | Wild Type<br>Wild Type | 3N+0; N=0<br>3N+0; N=0   | In Frame<br>In Frame                           | FGF5 <sup>+</sup> /FGF5 <sup>+</sup> |
| #2    | GCCCCAAAG.....CGCCGGTAGCACCTGCTT<br>GCCCCAAAGCC.....CGCCGGTAGCACCTGCTT                                                           | -58bp<br>-58bp+2bp     | 3N+1; N=19<br>3N+2; N=18 | Premature Termination<br>Premature Termination | FGF5 <sup>-</sup> /FGF5 <sup>-</sup> |
| #3    | GCCCCAAAGGCAACCCGGACCCGCTG...32bp...AGCCGGAGCGCCGGTAGCACCTGCTT<br>GCCCCAAAGCC.....CGCCGGTAGCACCTGCTT                             | Wild Type<br>-58bp+2bp | 3N+0; N=0<br>3N+2; N=18  | In Frame<br>Premature Termination              | FGF5 <sup>+</sup> /FGF5 <sup>-</sup> |
| #4    | GCCCCAAAG.....CGCCGGTAGCACCTGCTT<br>GCCCCAAAG.....CGCCGGTAGCACCTGCTT                                                             | -58bp<br>-58bp         | 3N+1; N=19<br>3N+1; N=19 | Premature Termination<br>Premature Termination | FGF5 <sup>-</sup> /FGF5 <sup>-</sup> |
| #5    | GCCCCAAAGCC.....CGCCGGTAGCACCTGCTT<br>GCCCCAAAGCC.....CGCCGGTAGCACCTGCTT                                                         | -58bp+2bp<br>-58bp+2bp | 3N+2; N=18<br>3N+2; N=18 | Premature Termination<br>Premature Termination | FGF5 <sup>-</sup> /FGF5 <sup>-</sup> |
| #6    | GCCCCAAAGGCAACCCGGACCCGCTG...32bp...AGCCGGAGCGCCGGTAGCACCTGCTT<br>GCCCCAAAG.....CGCCGGTAGCACCTGCTT                               | Wild Type<br>-58bp     | 3N+0; N=0<br>3N+1; N=19  | In Frame<br>Premature Termination              | FGF5 <sup>+</sup> /FGF5 <sup>-</sup> |

46

47

48

49

50

51

52

53

54

55

56

57

58

59

60

61

62

63

64

65

66

67

68

**Figure S3 Gene editing events of F2 FGF5<sup>-/-</sup> rabbits.** Six genotypes are shown in numbers #1-#6; sequence: the PAM sequence is indicated in green; the target sequence is indicated in red; the insertion sequence is indicated in blue. All modifications were determined by alignment with the WT sequence. Fragment change shows the predicted translation events (premature termination or in frame) resulting from targeting based on exact mutations. Allelic modifications indicate characterization of targeting by biallelic modification or monoallelic modification; +/+, WT; -/-, biallelic modification; +/-, monoallelic modification.

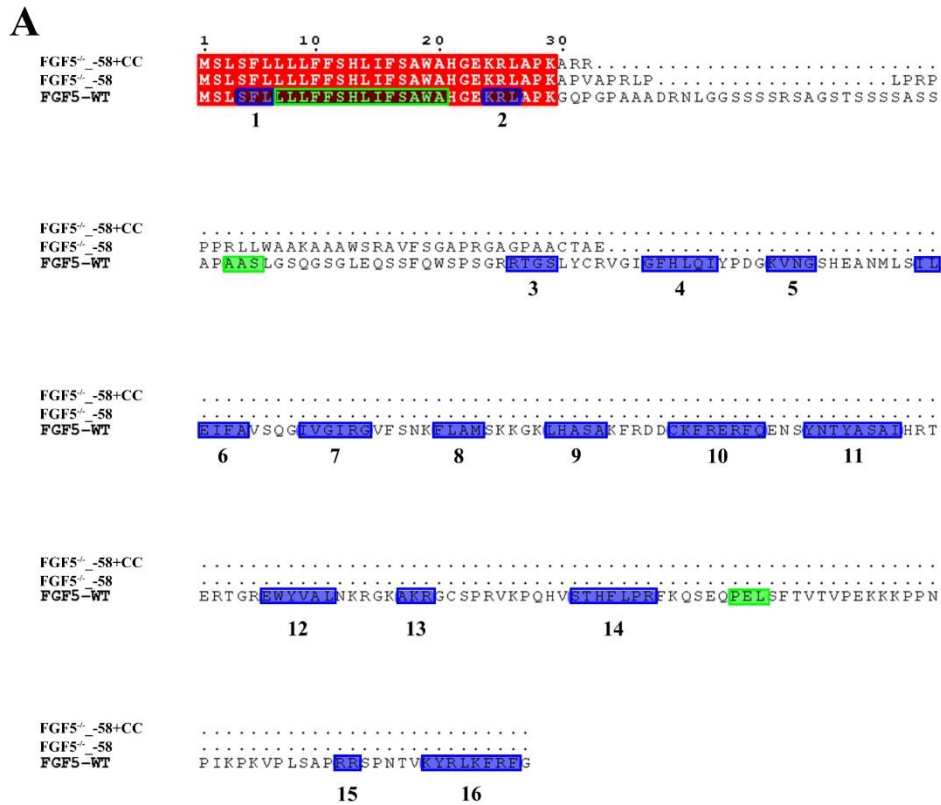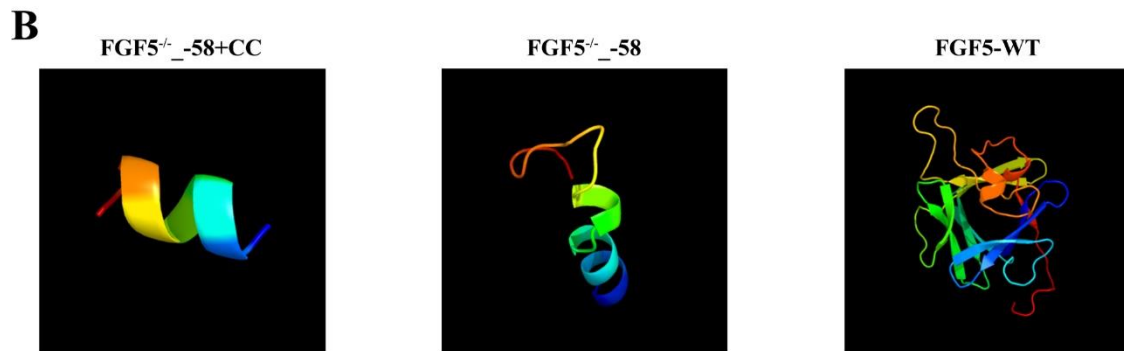

**Figure S4 Prediction of the structural alteration among predominant FGF5-targeted and WT proteins.**

A) Alignment of amino acid sequences of truncated FGF5, WT FGF5 and WT FGF5s proteins. Residues that are identical are shown in red. The location of 16  $\beta$ -stands and 3 alpha-helices in the FGF5 WT protein, which are predicted by PHY2 software, are highlighted in blue and green, respectively. B)-E) 3D models built by the Phyre server represent the WT FGF5, WT FGF5s and loss-of-function FGF5.

69  
70  
71  
72  
73  
74  
75  
76  
77  
78  
79  
80  
81  
82  
83  
84

85 **Tables**86 **Table S1. Generation of genetically targeted rabbits using CRISPR/Cas9**

|   | gRNA/Cas9<br>mRNA(ng/uL) | Embryos<br>injected | Transferred<br>embryos (%<br>microinjected) | Recipients | Pups obtained<br>(%transferred) | mutant transmission<br>(%pups) |
|---|--------------------------|---------------------|---------------------------------------------|------------|---------------------------------|--------------------------------|
| 1 | 40/200                   | 42                  | 32(76.2%)                                   | YES        | 8(25%)                          | 2(25%)                         |
| 2 | 40/200                   | 37                  | 35(94.6%)                                   | NO         |                                 |                                |
| 3 | 40/200                   | 38                  | 33(86.8%)                                   | NO         |                                 |                                |
| 4 | 40/200                   | 40                  | 37(92.5%)                                   | NO         |                                 |                                |

87

88 **Table S2: Primers used in PCR and QPCR.**

| Name                | Primers  | Sequence (5'-3')         | Produce size(bp) |
|---------------------|----------|--------------------------|------------------|
| sgRNA1              | sgRNA1-F | TAGGACGAGGTGCTACCGGCGCTC | 24               |
|                     | sgRNA1-R | AAACGAGCGCCGGTAGCACCTCGT |                  |
| sgRNA2              | sgRNA2-F | TAGGAGAAGCGCCTCGCCCCAAA  | 24               |
|                     | sgRNA2-R | AAACTTTGGGGGCGAGGCGCTTCT |                  |
| FGF5                | FGF5-F   | AGAATGAGCTTGTCTTCC       | 333              |
|                     | FGF5-R   | GCCATTGACTTTGCCATC       |                  |
| FGF5-Q-PCR          | F5-Q-F   | ATCTACCCGGATGGCAAAG      | 101              |
|                     | F5-Q-R   | CTCCTCGTATTCTACAATCCC    |                  |
| TGF- $\beta$ -Q-PCR | T-Q-F    | GACACCCAGTACAGCAAGG      | 111              |
|                     | T-Q-R    | GTAGTACACGATGGGCAGTG     |                  |
| GAPDH-Q-PCR         | G-Q-F    | TTCCACGGCAGGTCAAGGC      | 99               |
|                     | G-Q-R    | GGGCACCAGCATCACCCAC      |                  |
| VERSICAN-Q-PCR      | V-Q-F    | CTTATGTAGACACTGCCCATACC  | 113              |
|                     | V-Q-R    | TTGAGAGGGCTGACCTAGAA     |                  |
| BMP2-Q-PCR          | B2-Q-F   | GATCACCTGAACTCCACTAACC   | 124              |
|                     | B2-Q-R   | CATCAAGGTACAGCATGGAGATA  |                  |
| BMP4-Q-PCR          | B4-Q-F   | CCTGGTCAACTCTGTCAACTC    | 104              |
|                     | B4-Q-R   | GTACCACCTTGCATACTCATCC   |                  |

89

90 **Table S3. 8 potential off-target sites examined by PCR and primers used for list.**

|    | Potential Off Target Site     | Number of<br>mismatches | Position            | PCR Primer                                               |
|----|-------------------------------|-------------------------|---------------------|----------------------------------------------------------|
| S1 | GGGGGTCC <b>TC</b> ATTGCCCTTT | 4                       | chrUN0:<br>+2082728 | F: CCTCTGCCCTGTCCAATTT<br>R: GGATACAGTTAGAAGCCGTAAGAG    |
|    | TGGGGTCCAGGTTGCC <b>TTTT</b>  | 4                       | chrUN0: +208274     | F: CCAGAGTGCTGTCACTCATATAAT<br>R: GAATCCCAGAAGAGATCGGAAG |
|    | GCGGGTCCG <b>CC</b> TTGCCCTCT | 3                       | chrUN0: +477181     | F: CGTAGTAGGTAGCCTTGATTGG<br>R: CAGCAGTTTGCATGTGTGAG     |
|    | GTGGGG <b>CA</b> GGGTTGCCCTTG | 4                       | chr19: -42656111    | F: CTCCTCGATGGGCTTGAAAT<br>R: CCAGGAAGCTGTCTGCTTAA       |

|    |                      |   |                      |                                                        |
|----|----------------------|---|----------------------|--------------------------------------------------------|
| S2 | ACCAGGTCTACCGGCCCTC  | 3 | chr12:<br>+148165087 | F: GTGAGGAAGATGGACTGAGATTT<br>R: ACATTAGCCCAGCTGGTATTT |
|    | GGGAGGTGCGCCGGCGCTC  | 4 | chr21: +8975184      | F: TGAGGTCTGAGTTCCGGTAT<br>R: CCAAGTGTTGCTTTCATGTTG    |
|    | ACCACGTGCACCCGGCGCTC | 4 | chr21: +8975184      | F: CCCATCTGCTGGCTTACTTTA<br>R: GAGGCAGACAGGATAGAAACAG  |
|    | AAGAGGGGCGACTGGCGCTC | 4 | chr14: -448996       | F: GCAGTTATCCCTCCCTGAATAG<br>R: CCTAGCTTTGCAACACCATTT  |

91

92

93
